# Supplementary material for: Mechanism-guided control of intracellular alkalinization and process pH for production of recombinant human B-type natriuretic peptide under the cSAT scheme in Escherichia coli
Source: Research Square preprint supplement (doi:10.21203/rs.3.rs-8252127/v1), 2025-12-15
Supplement: Supplementary file 1 [file fb690a5a2c29087b96210256.docx]

## Supplementary materials

**Mechanism-guided control of intracellular alkalinization and process pH for production of recombinant human B-type natriuretic peptide under the cSAT scheme in *Escherichia coli***

Hang Niea, b ,c, Yajun Fenga, b, c, Guanghui Suna, b, c, Haijie Lia, b, c, Jingwen Kanga, b, c, Yanqing Zhanga, b, c, Chenhui Zhua, b, c, Yu Mia, b, c, Yuan Guoa, b, c, Pei Maa, b, c*

a Engineering Research Center of Western Resource Innovation Medicine Green Manufacturing, Ministry of Education, School of Chemical Engineering, Northwest University, Xi'an, 710127, China

b Shaanxi Key Laboratory of Biomaterials and Synthetic Biology, Shaanxi R&D Center of Biomaterials and Fermentation Engineering, School of Chemical Engineering, Northwest University, Xi'an, 710127, China

c Biotech. & Biomed. Research Institute, Northwest University, Xi'an, 710127, China

*Corresponding author:

Prof. Pei Ma

E-mail: mapei@nwu.deu.cn

1. **Supplementary methods**

**In-gel proteolysis of rhBNP bands**

Gel pieces containing the target band were excised and transferred to low-binding tubes. Coomassie was removed by repeated washes with 100 mM ammonium bicarbonate (ABC)/30% acetonitrile (ACN) until fully destained. Gel pieces were then dehydrated in 100% ACN and air-dried. Reduction and alkylation followed a standard in-gel protocol: gel pieces were rehydrated in DTT solution (e.g., 10 mM DTT in 100 mM ABC) at 56 °C for 45 min, cooled to room temperature, briefly rinsed with ABC, and incubated in iodoacetamide (IAM) solution (e.g., 20 mM IAM in 100 mM ABC, protected from light) at RT for 30 min. After alkylation, gels were washed with 100 mM ABC, dehydrated with 100% ACN, and dried. For proteolysis, gels were rehydrated on ice with a mixed protease solution containing trypsin, Lys-C, and chymotrypsin (each 50 ng) in 50 mM ABC (volume just sufficient to cover the gel). After 30 min on ice to allow enzyme uptake, additional 50 mM ABC was added to keep gels submerged. Digestion proceeded at 37 °C for 18 h. Peptides were recovered by collecting the supernatant, followed by two sequential extractions of the gel with 50% ACN/0.1% formic acid (FA); all fractions were pooled and dried in a vacuum concentrator. Dried peptides were reconstituted in 0.1% FA in water (typically 10-50 µL) for LC-MS analysis.

**Liquid chromatography (LC) separation**

Peptide digests were separated on a UHPLC system (Thermo Fisher Easy-nLC 1000) using a C18 column (Dr. Maisch GmbH; 3 µm; polymicro, ID 150 µm × 20 mm). Mobile phase A was 0.1% formic acid (FA) in water and mobile phase B was 0.1% FA in acetonitrile. Samples were introduced via the autosampler, the column was maintained at 20 °C, and elution proceeded at 600 µL/min.

**Mass spectrometry (MS) acquisition**

The mass spectrometry acquisition was performed by Tsingke (Nanjing, China). Peptide eluates were analyzed on a Q Exactive HF-X Orbitrap mass spectrometer (Thermo Fisher Scientific) operated in positive-ion mode. Total acquisition time was 75 min. Data were collected in MSⁿ mode over an m/z 300-1400 scan range. Full-scan MS and data-dependent MS/MS (HCD) settings including Orbitrap resolution, AGC targets, maximum injection times, isolation window, NCE, dynamic exclusion. Raw files were saved in vendor format for downstream identification/quantification.

**AF-C loading time screen**

The strain harboring the pET-30a(+)/cSAT-rhBNP plasmid were induced as in the main methods and sampled at 12 h post-induction. For each condition, 2 mL aliquots were transferred to 15-mL tubes and incubated with AF-C (20 µM; 0.5% DMSO, v/v) on an orbital shaker at 21 °C, 250 rpm, protected from light, for 15, 30, 45, 60, or 75 min. After incubation, cells were washed 3 times with PBS and resuspended in 1 mL saline for imaging. Confocal imaging used a Leica TCS SP5 spectral system with identical settings across time points (Ex 561/640 nm; Em 630/740 nm).

1. **Supplemental Figures**

**
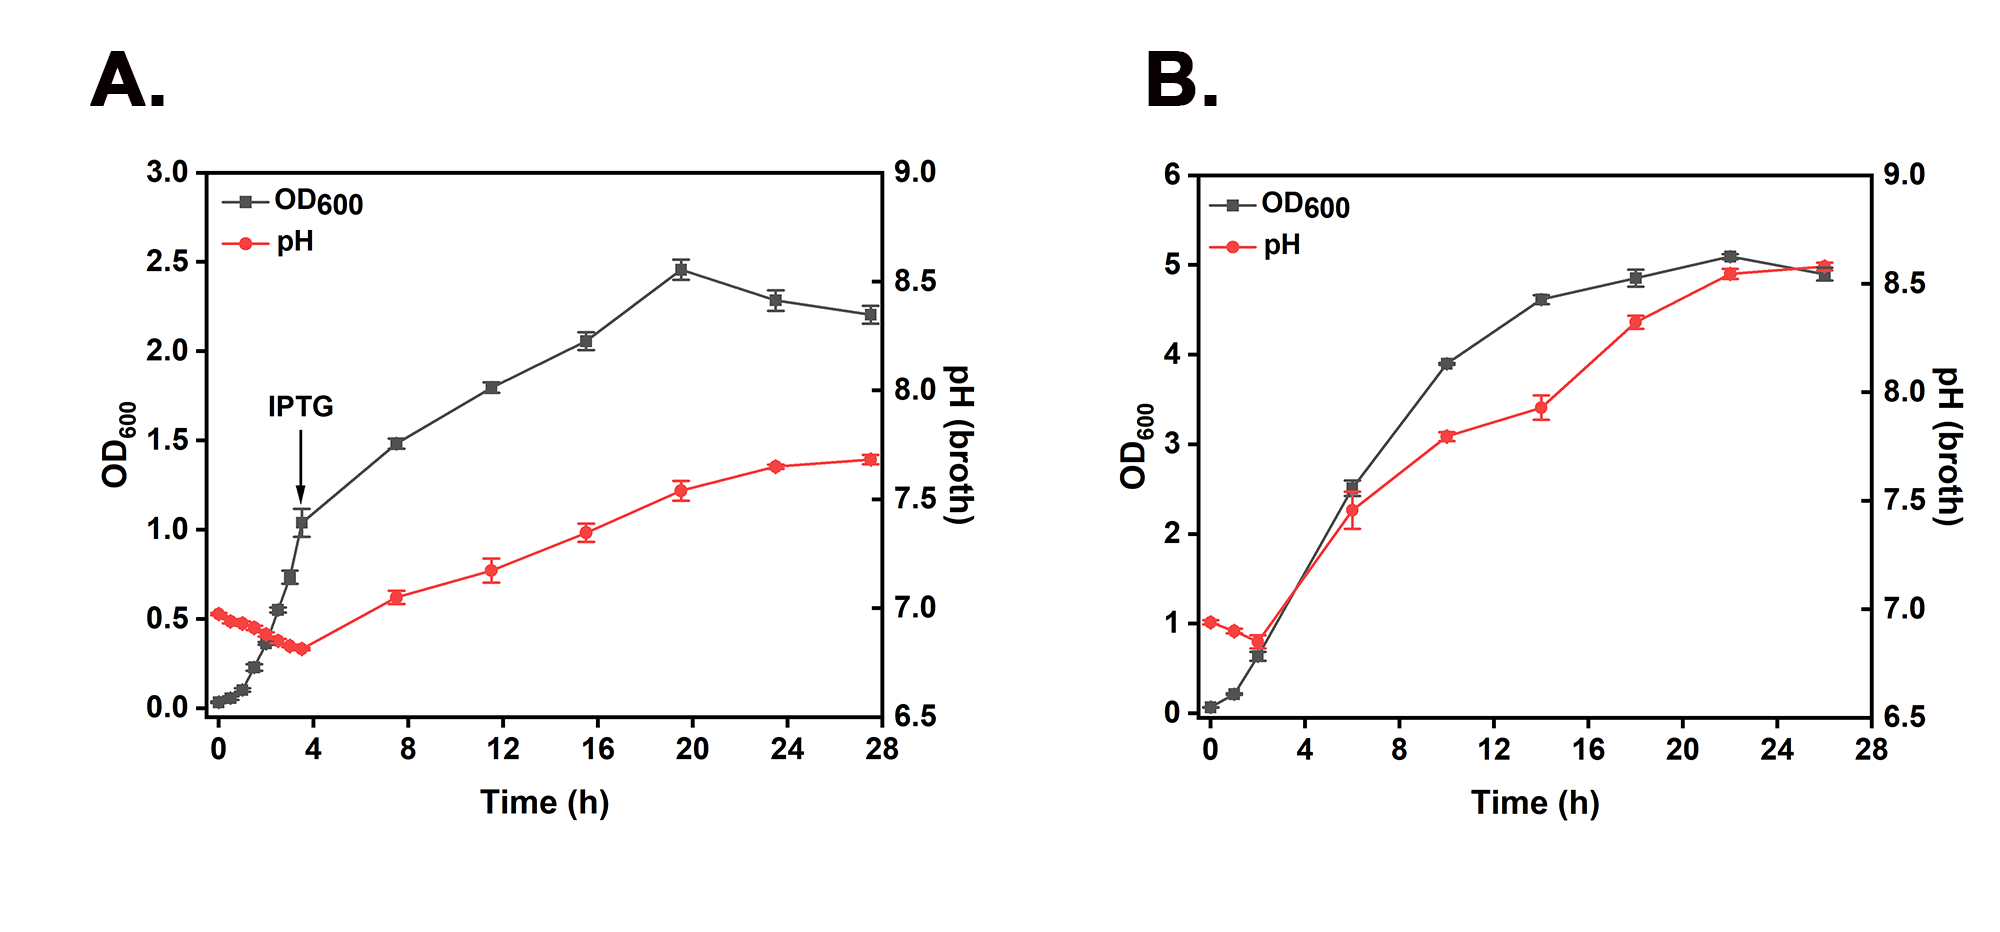
**

**Fig. S1.** Growth curve and medium pH shift under 18℃ induction. (A) Growth curve and pH profile of strain harboring the pET-30a(+) (empty vector control) under 18℃ induction. (B) Growth curve and pH profile of strain harboring the pET-30a(+)/cSAT-rhBNP plasmid under 18℃ induction.


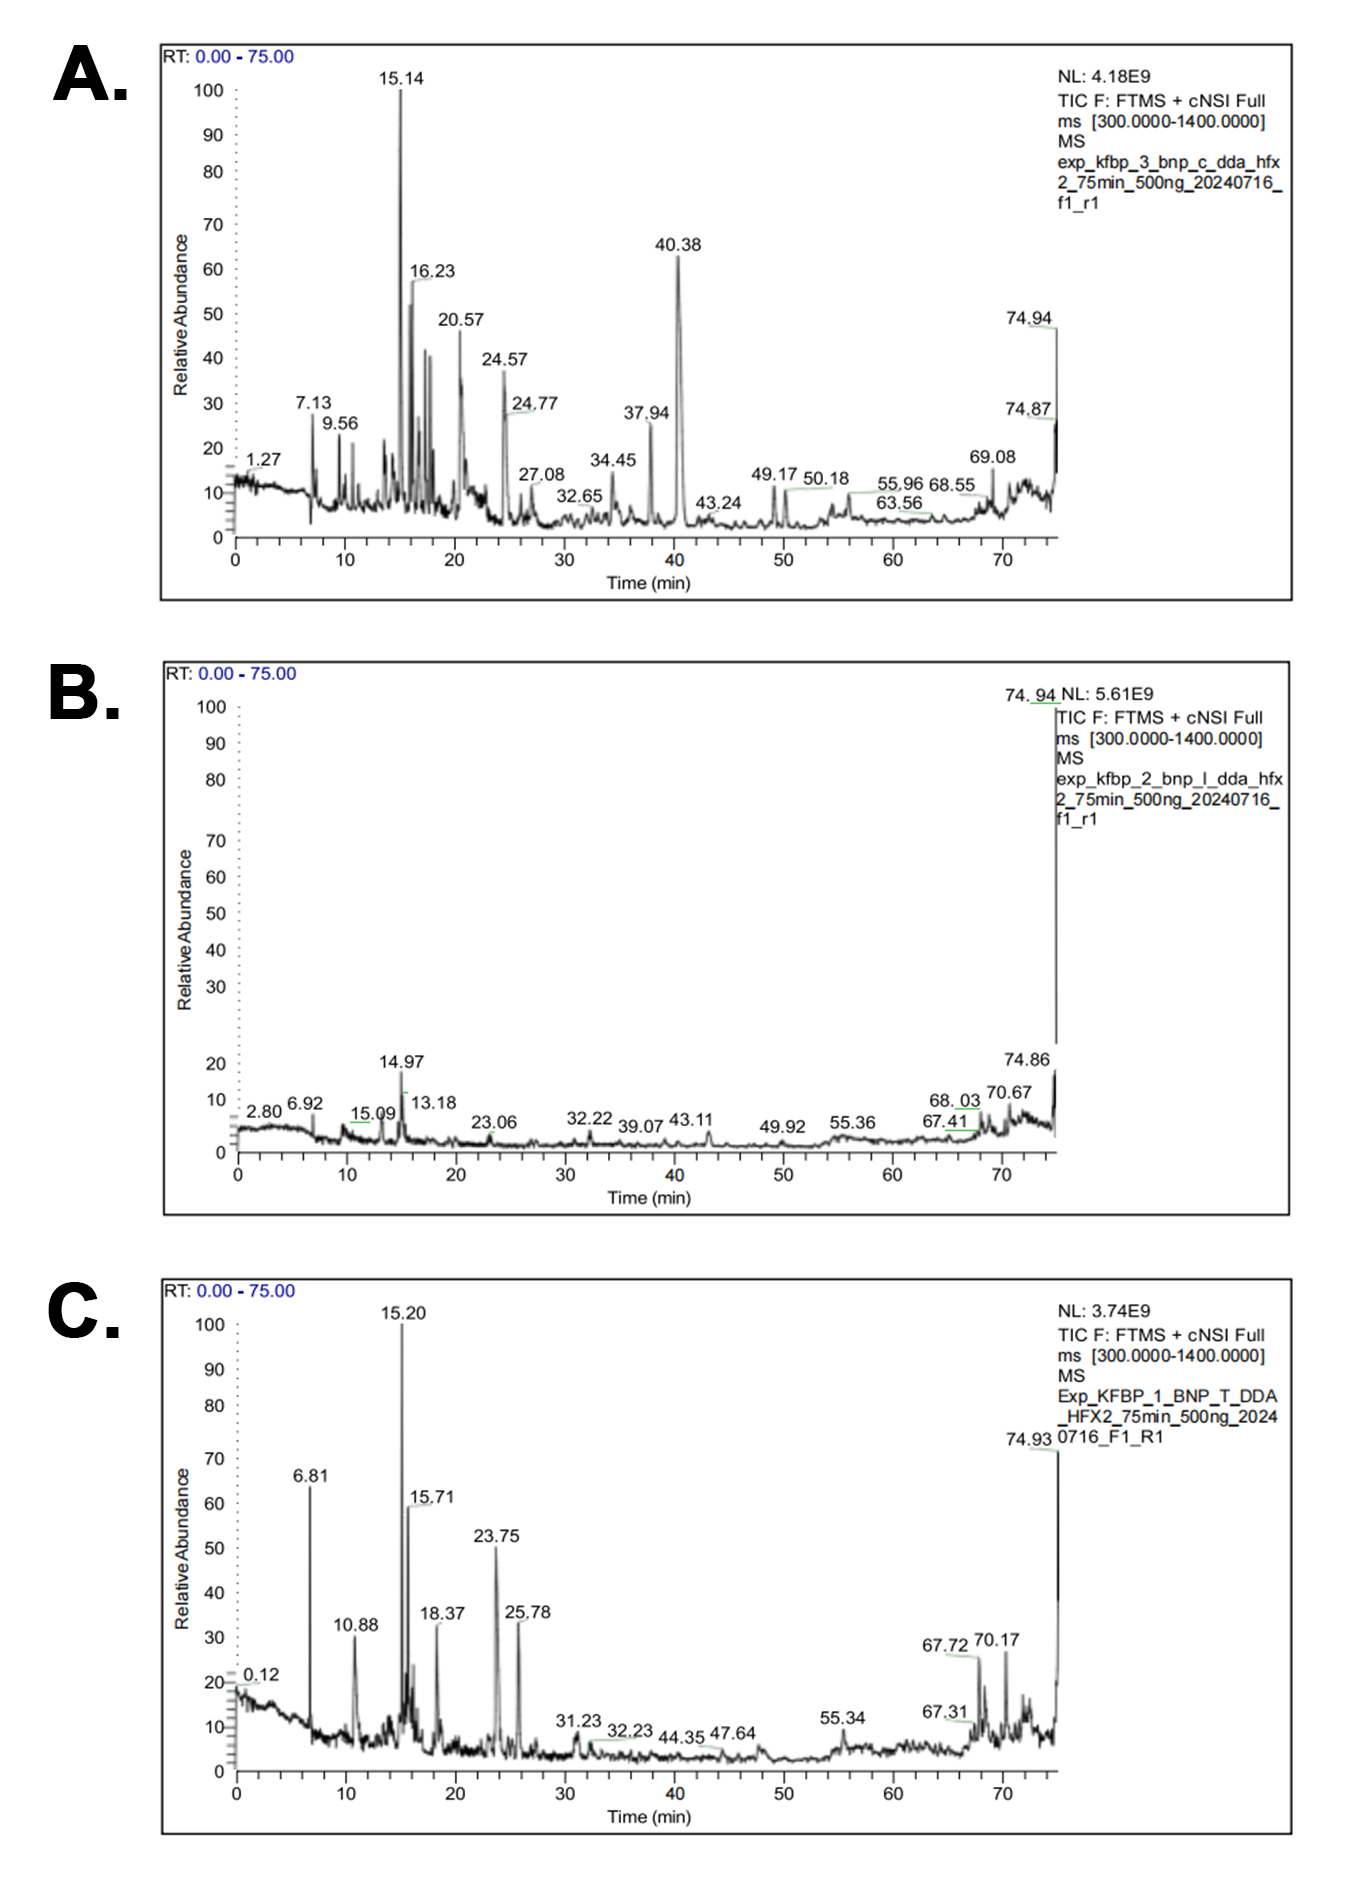


**Fig. S2.** LC-MS Total Ion Chromatograms (TICs) of rhBNP after proteolytic digestion with trypsin, Lys-C, and chymotrypsin. (A) Trypsin digest of rhBNP. (B) Lys-C digest of rhBNP. (C) Chymotrypsin digest of rhBNP.


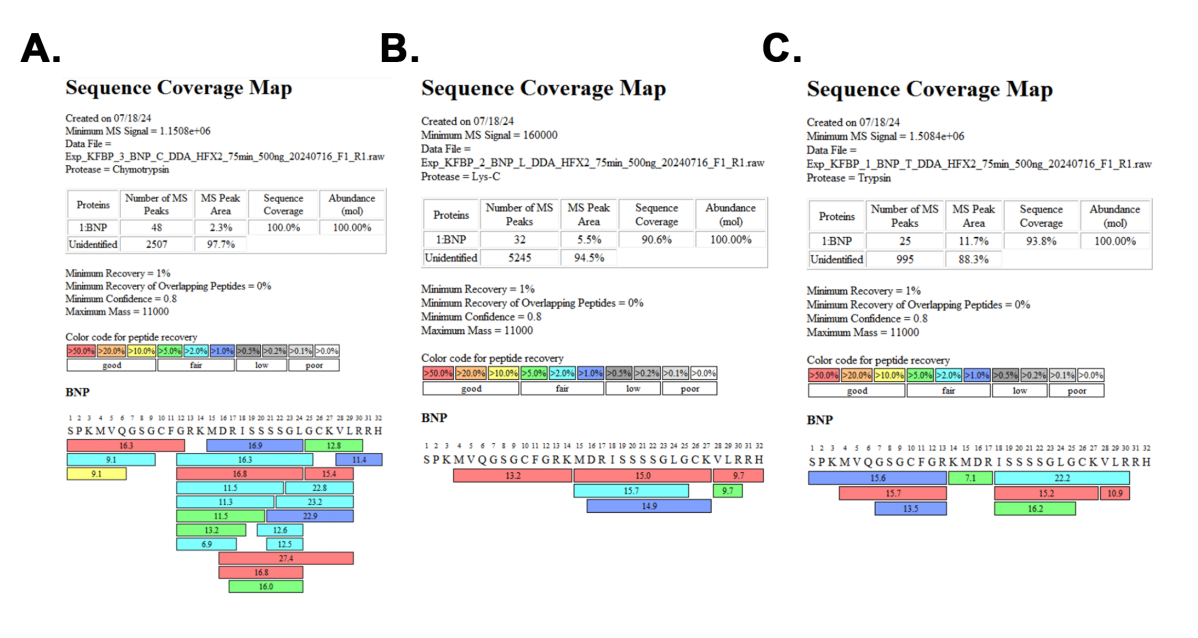


**Fig. S3.** Sequence coverage maps of rhBNP after proteolysis with trypsin, Lys-C, and chymotrypsin. (A) Trypsin sequence coverage of rhBNP (Sequence coverage: 93.8%). (B) Lys-C sequence coverage of rhBNP (Sequence coverage: 90.6%). (C) Chymotrypsin sequence coverage of rhBNP (Sequence coverage: 100%).


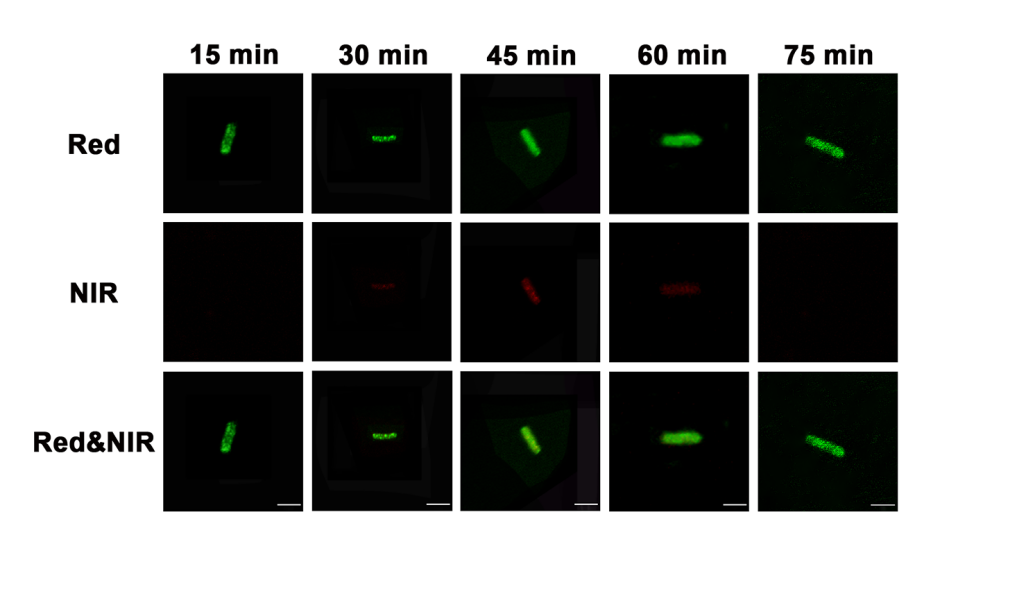


**Fig. S4.** Determination of the optimal AF-C incubation time for intracellular pH imaging in *E. coli*.


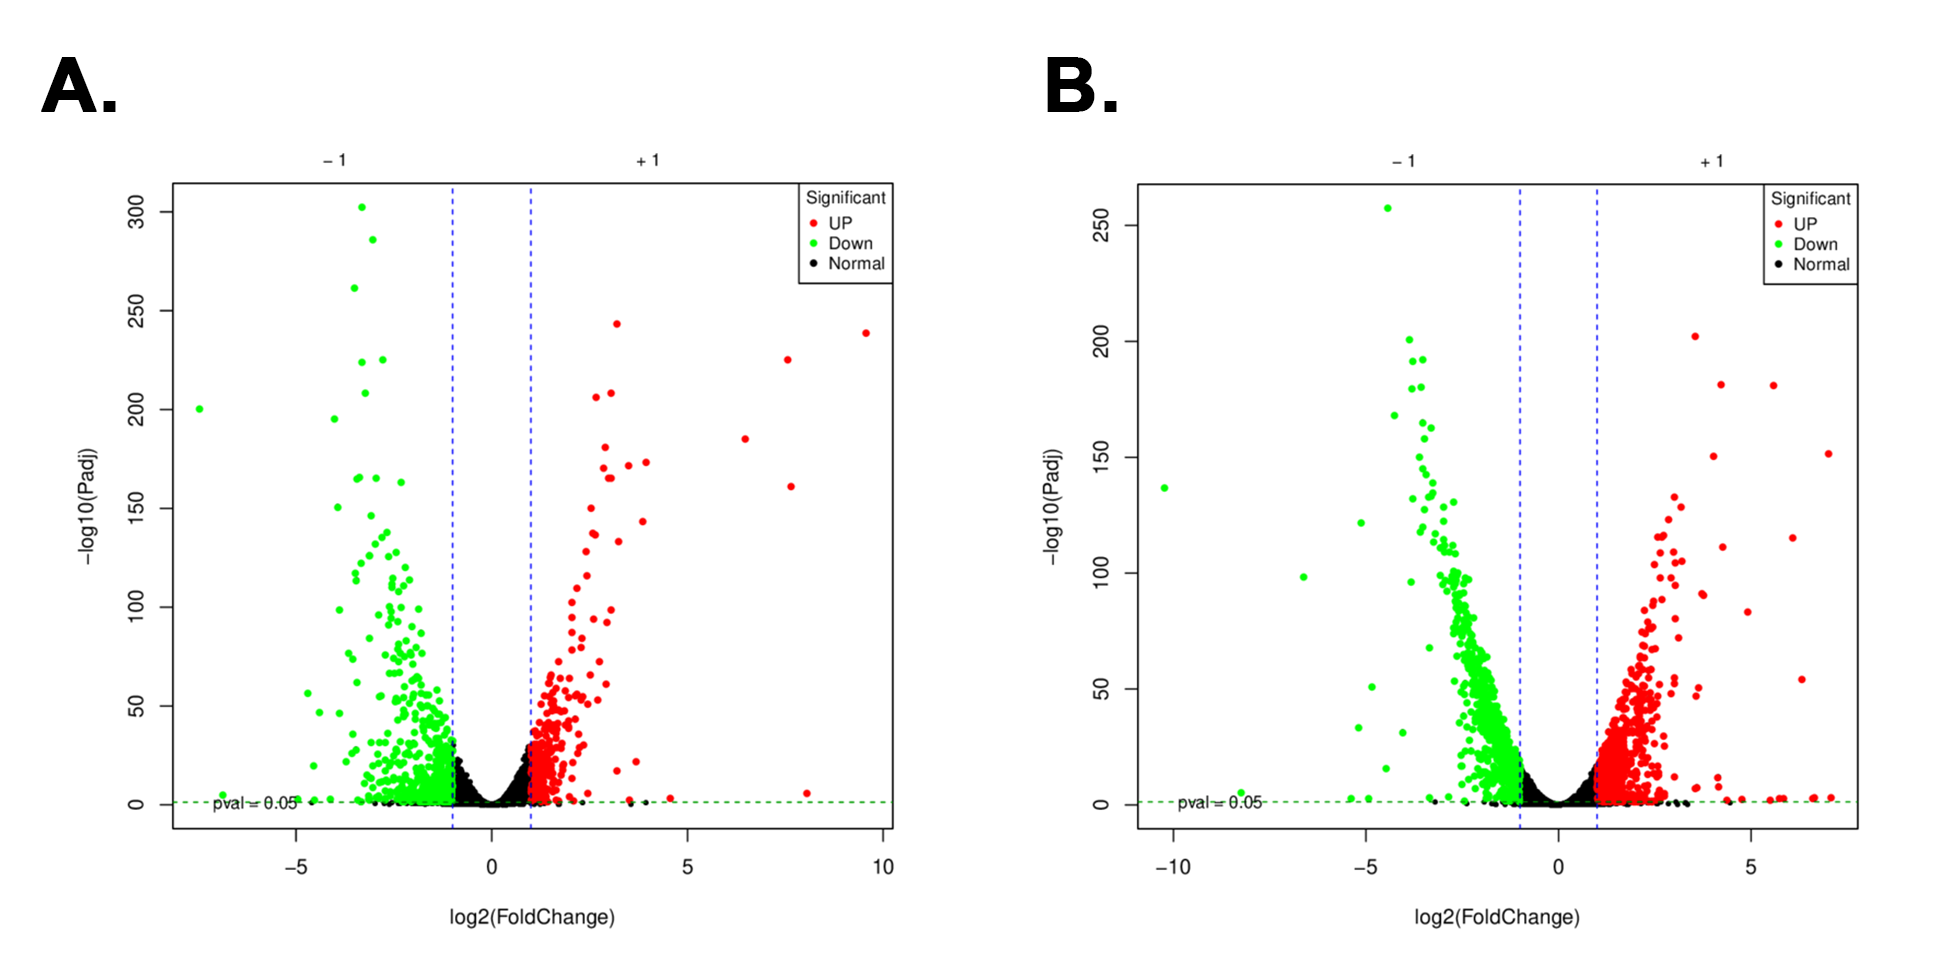


**Fig. S5.** Volcano plots of differentially expressed genes across induction times during rhBNP expression. (A) Volcano plot of differential gene expression at 0 h post-induction. (B) Volcano plot of differential gene expression at 24 h post-induction.


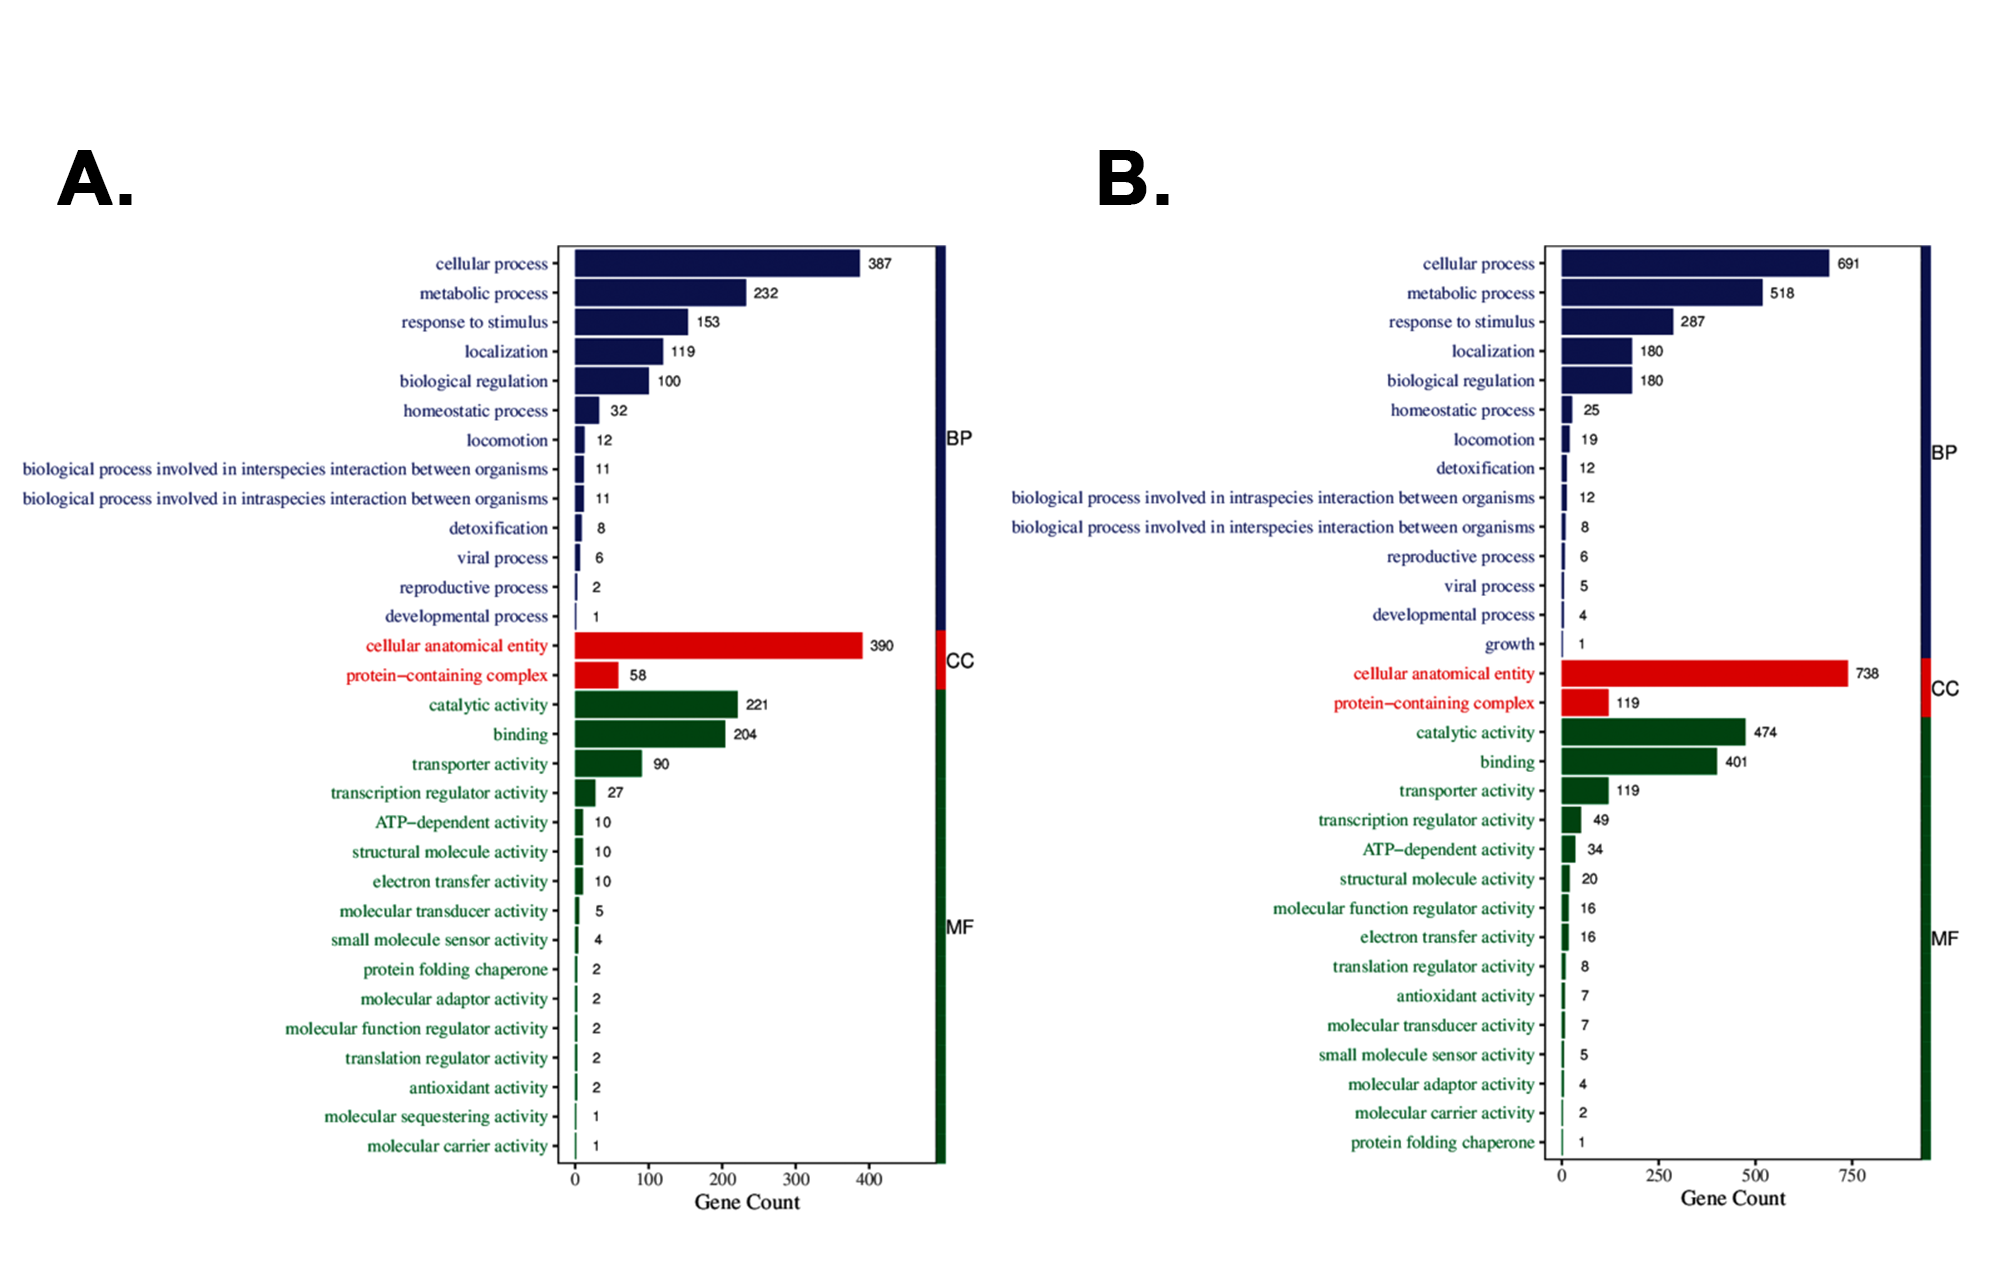


**Fig. S6.** GO enrichment of DEGs across induction times during rhBNP expression. (A) GO enrichment of DEGs at 0 h post-induction. (B) GO enrichment of DEGs at 24 h post-induction.


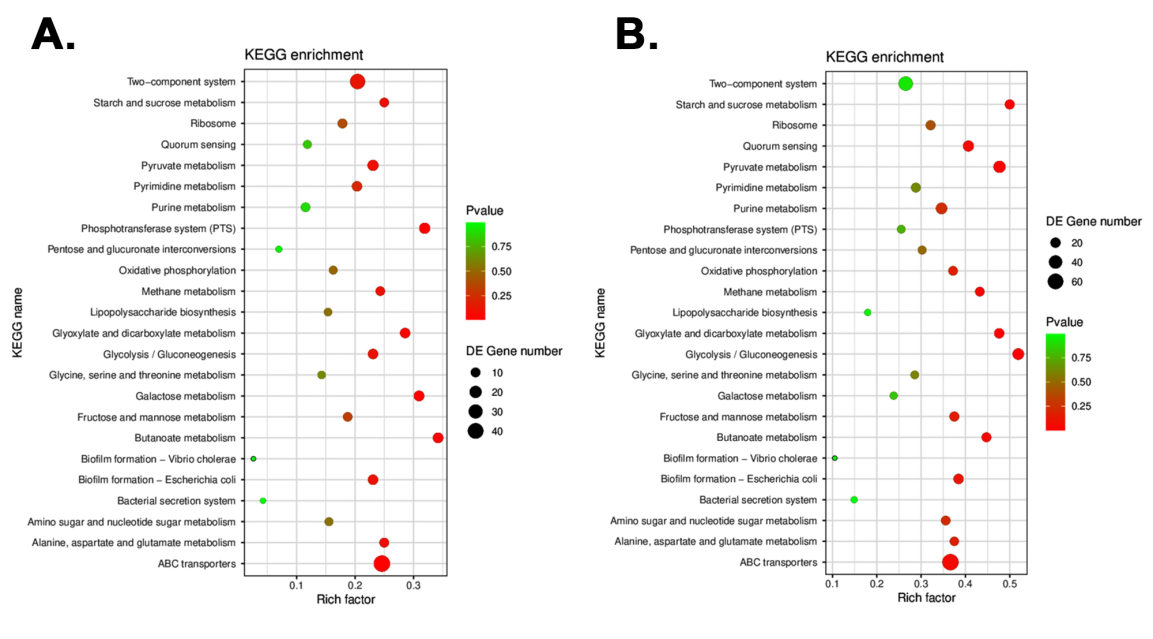


**Fig. S7.** KEGG enrichment of DEGs across induction times during rhBNP expression. (A) KEGG enrichment of DEGs at 0 h post-induction. (B) KEGG enrichment of DEGs at 24 h post-induction.


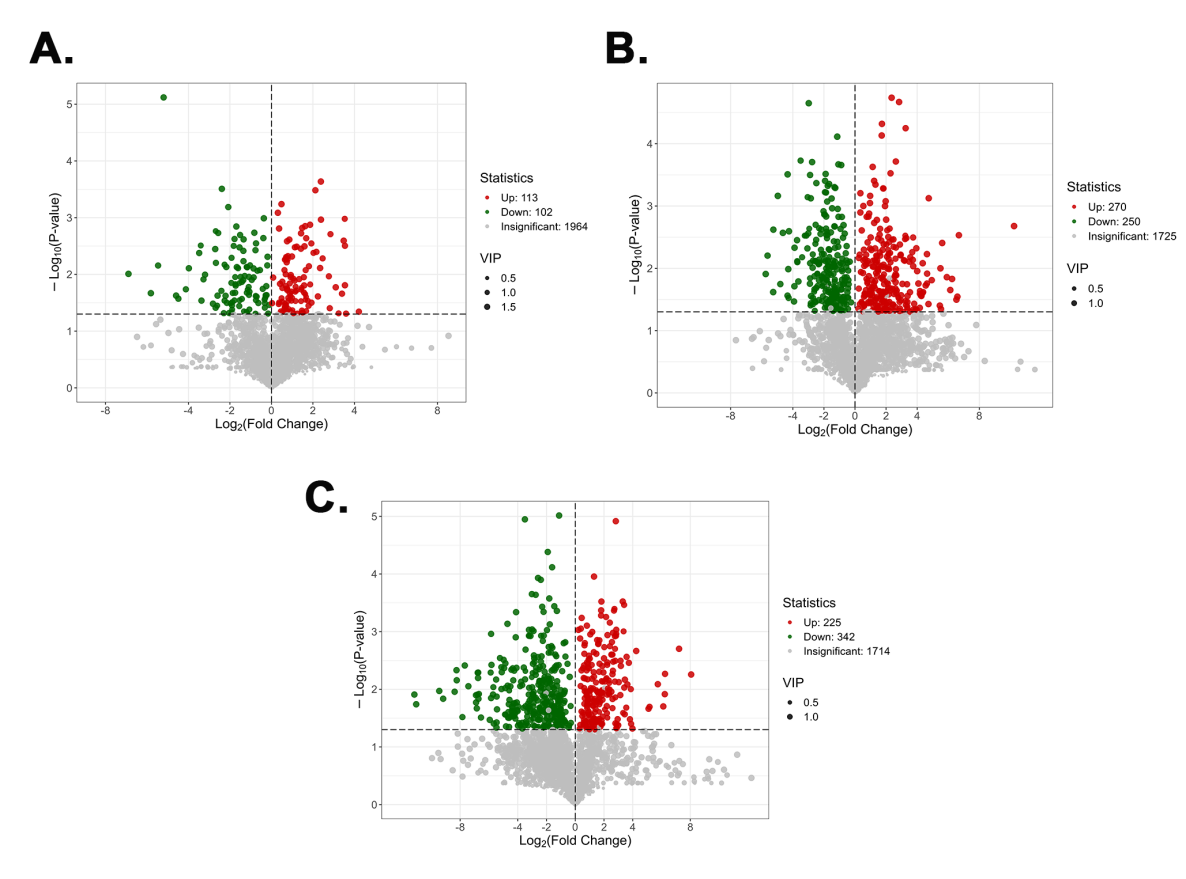


**Fig. S8.** Volcano plots of differentially abundant metabolites across induction times during rhBNP expression. (A) Volcano plots of differentially abundant metabolites at 0 h post-induction. (B) Volcano plots of differentially abundant metabolites at 12 h post-induction. (C)Volcano plots of differentially abundant metabolites at 24 h post-induction.


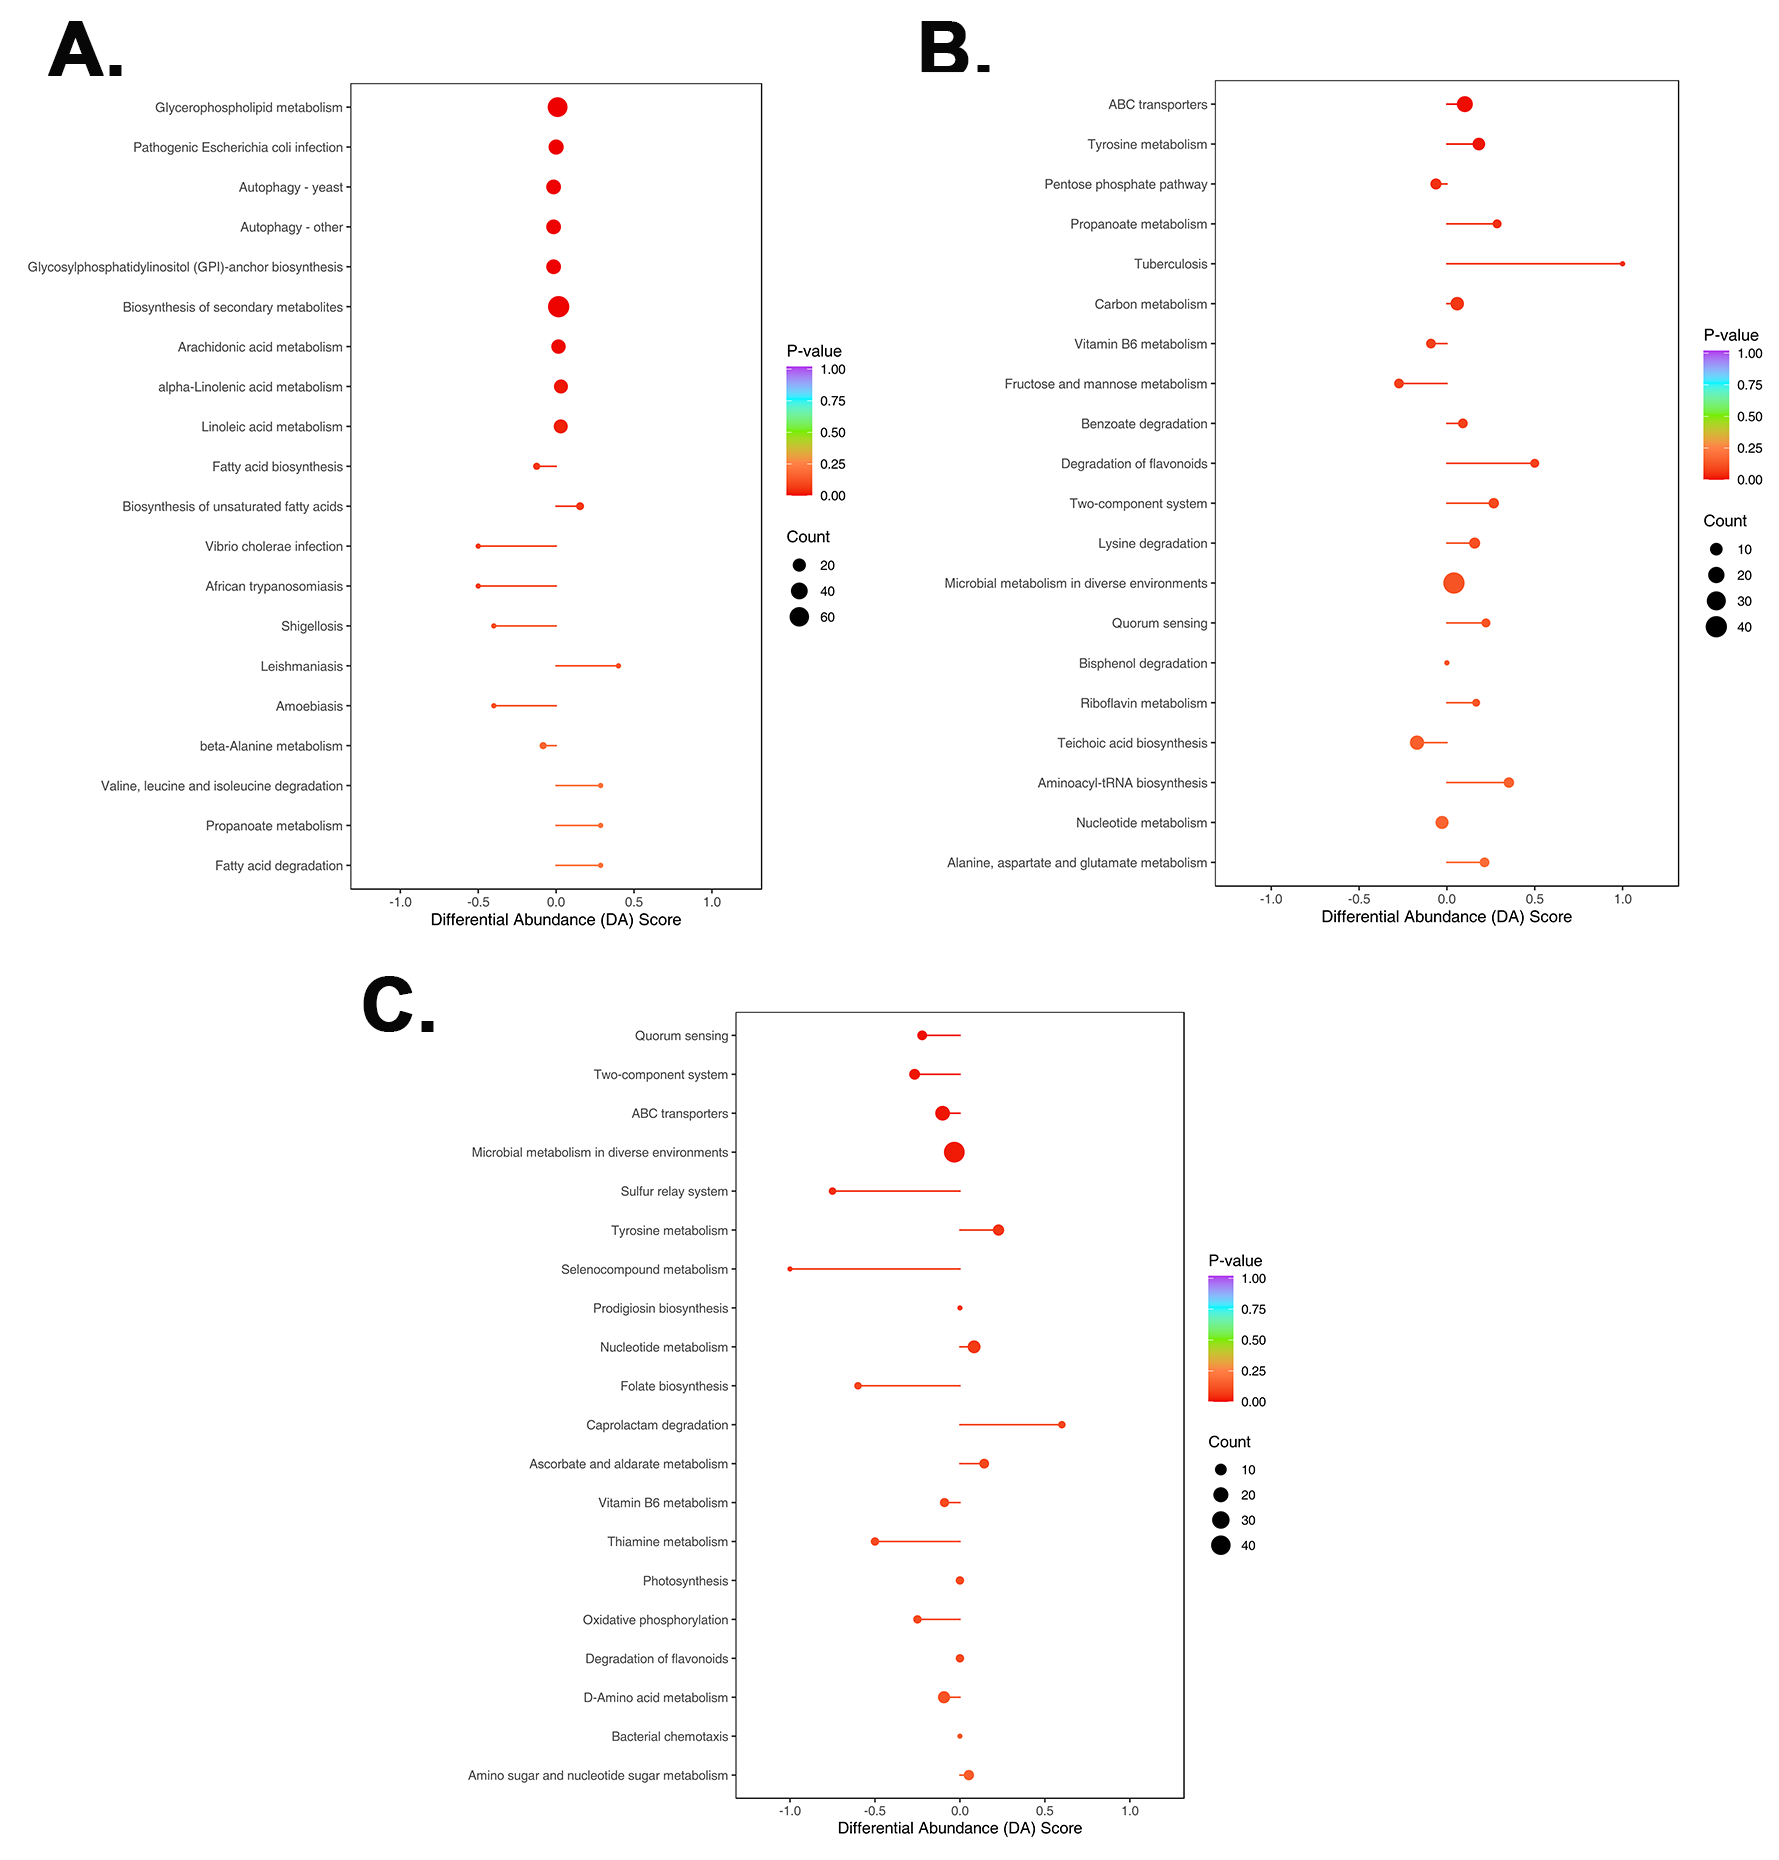


**Fig. S9.** KEGG enrichment of DAMs across induction times during rhBNP expression. (A) KEGG enrichment of DAMs at 0 h post-induction. (B) KEGG enrichment of DAMs at 12 h post-induction. (C)KEGG enrichment of DAMs at 24 h post-induction.


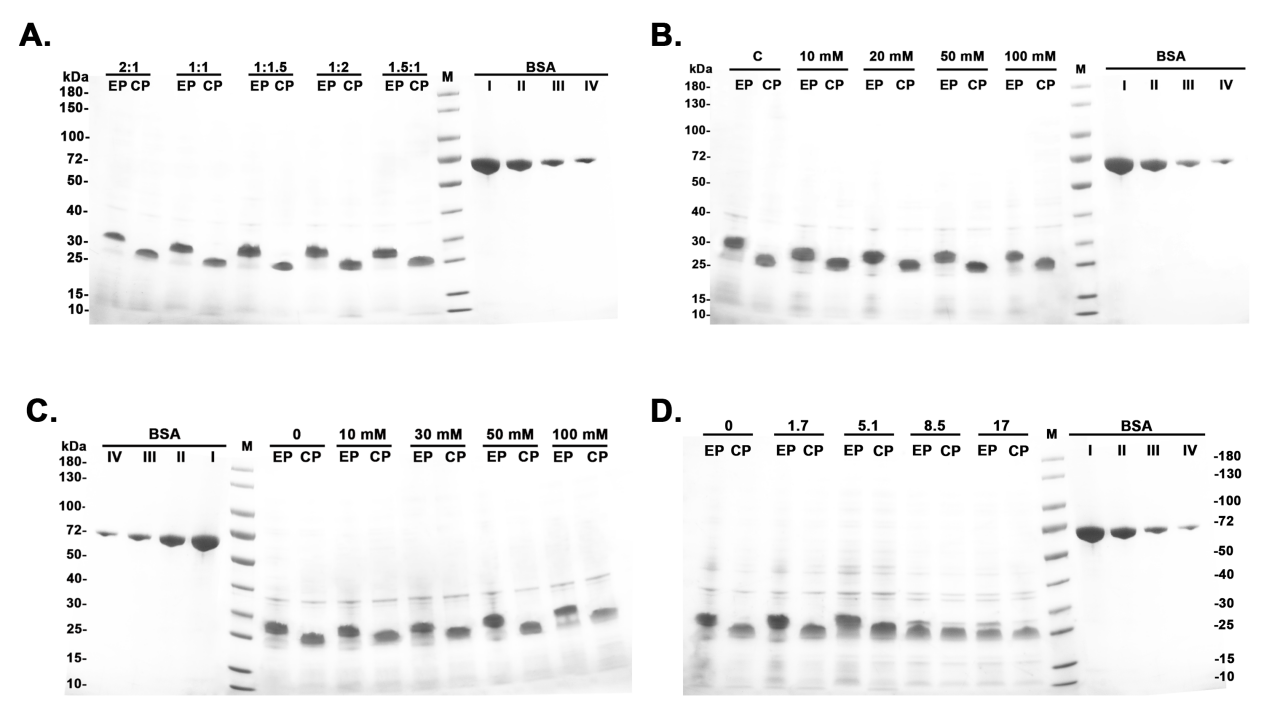


**Fig. S10.** SDS-PAGE result for cSAT-rhBNP after stepwise medium optimization. (A) SDS-PAGE result for cSAT-rhBNP under different tryptone:yeast-extract ratio. (B) SDS-PAGE results for cSAT-rhBNP under different phosphate buffer concentration. (C) SDS-PAGE result for cSAT-rhBNP under different glucose concentration. (D) SDS-PAGE results for cSAT-rhBNP under different ammonium sulfate concentration. EP: precipitate of the cell lysate after expression; CP: precipitate of intein-mediated cleavage; M: 10-180 kDa protein marker. The BSA standard concentrations I-IV were 2 mg/mL, 1 mg/mL, 0.5 mg/mL, 0.25 mg/mL, respectively.


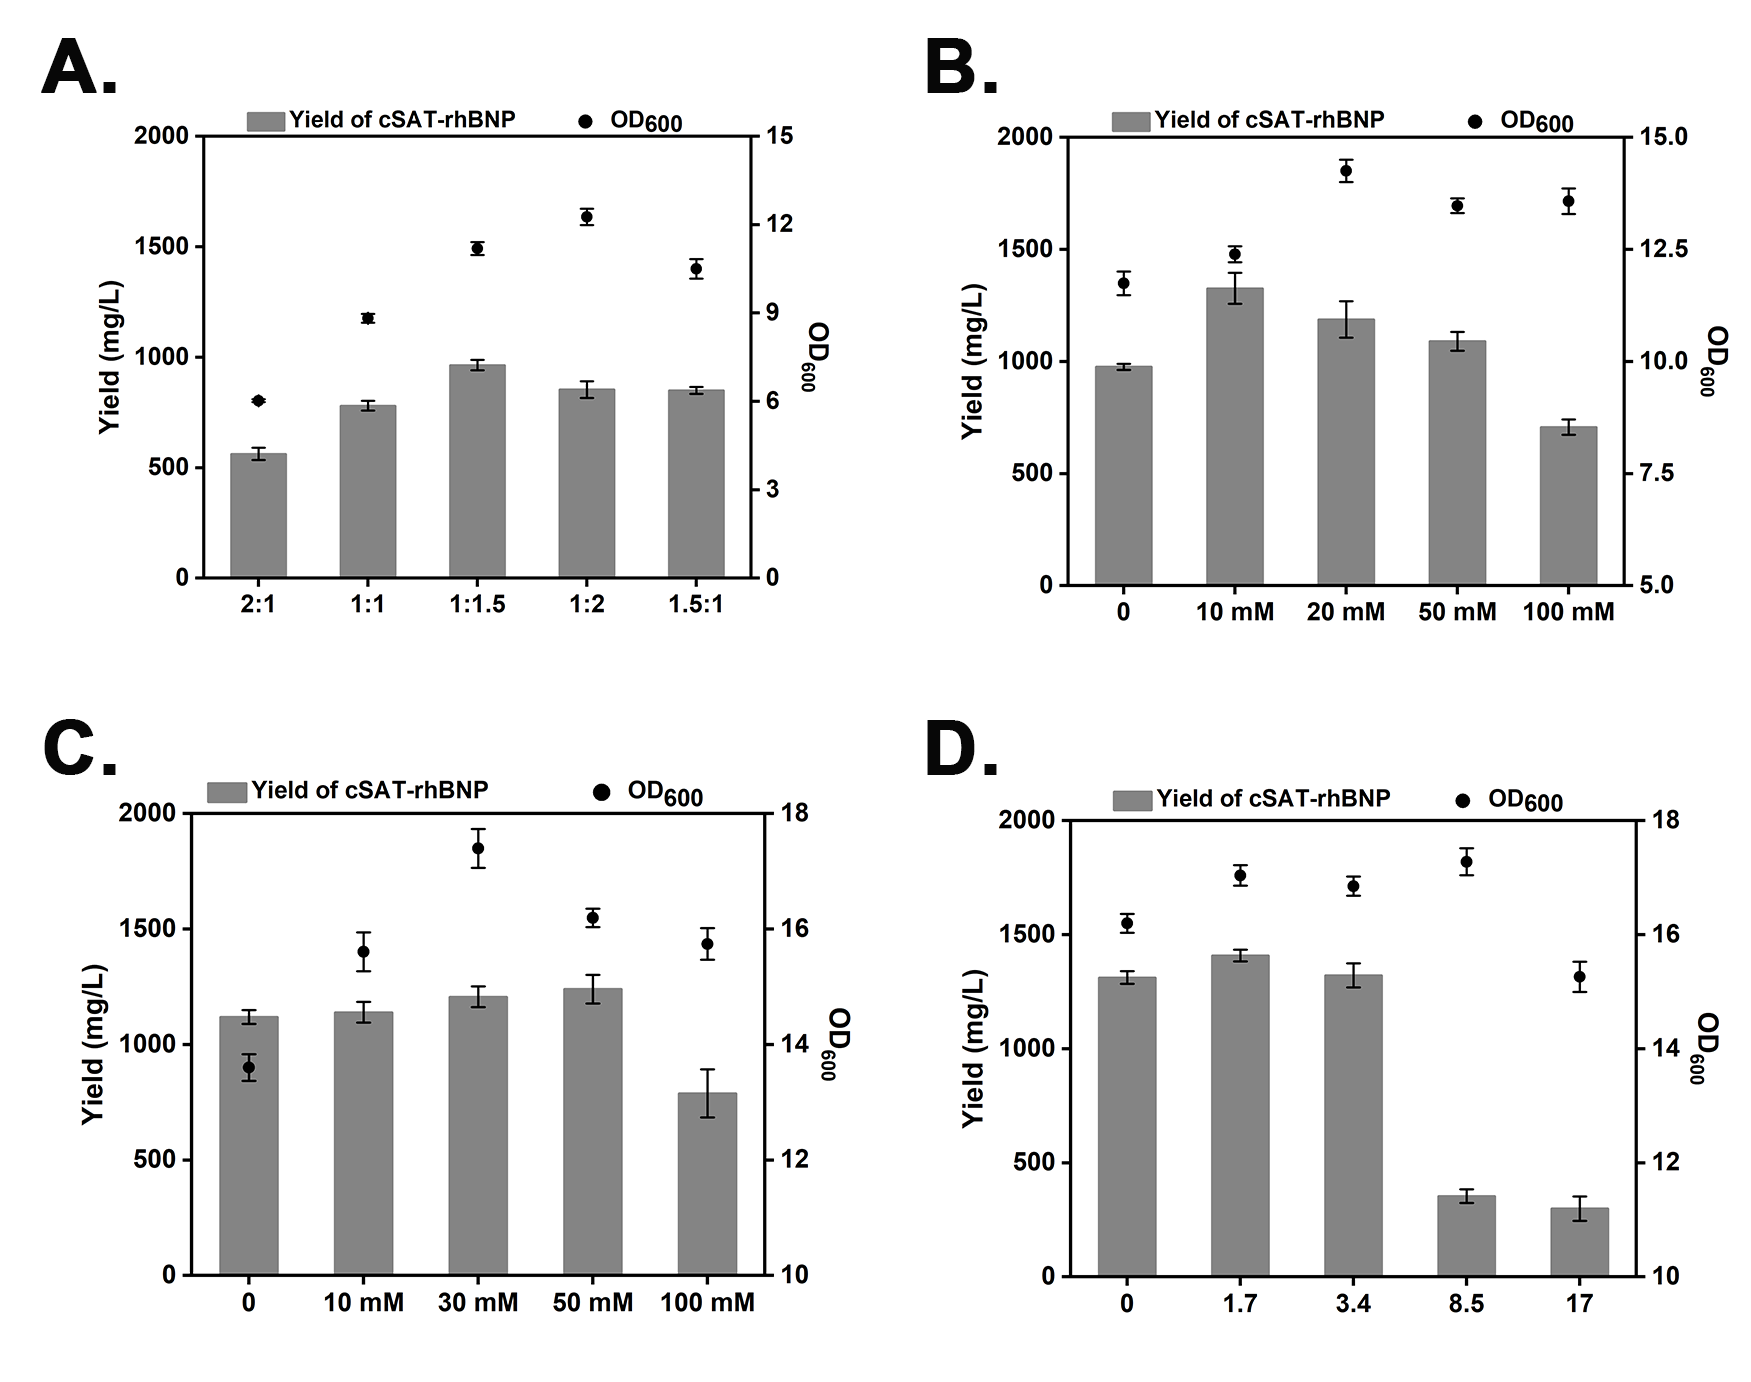


**Fig. S11.** Yield of fusion cSAT-rhBNP and terminal pH of broth after stepwise medium optimization. (A) Yield of fusion cSAT-rhBNP and terminal pH of broth under different tryptone/yeast-extract ratio. (B) Yield of fusion cSAT-rhBNP and terminal pH of broth under different phosphate buffer concentration. (G) Yield of fusion cSAT-rhBNP and terminal pH of broth under different glucose concentration. (H) Yield of fusion cSAT-rhBNP and terminal pH of broth under different ammonium sulfate concentration.


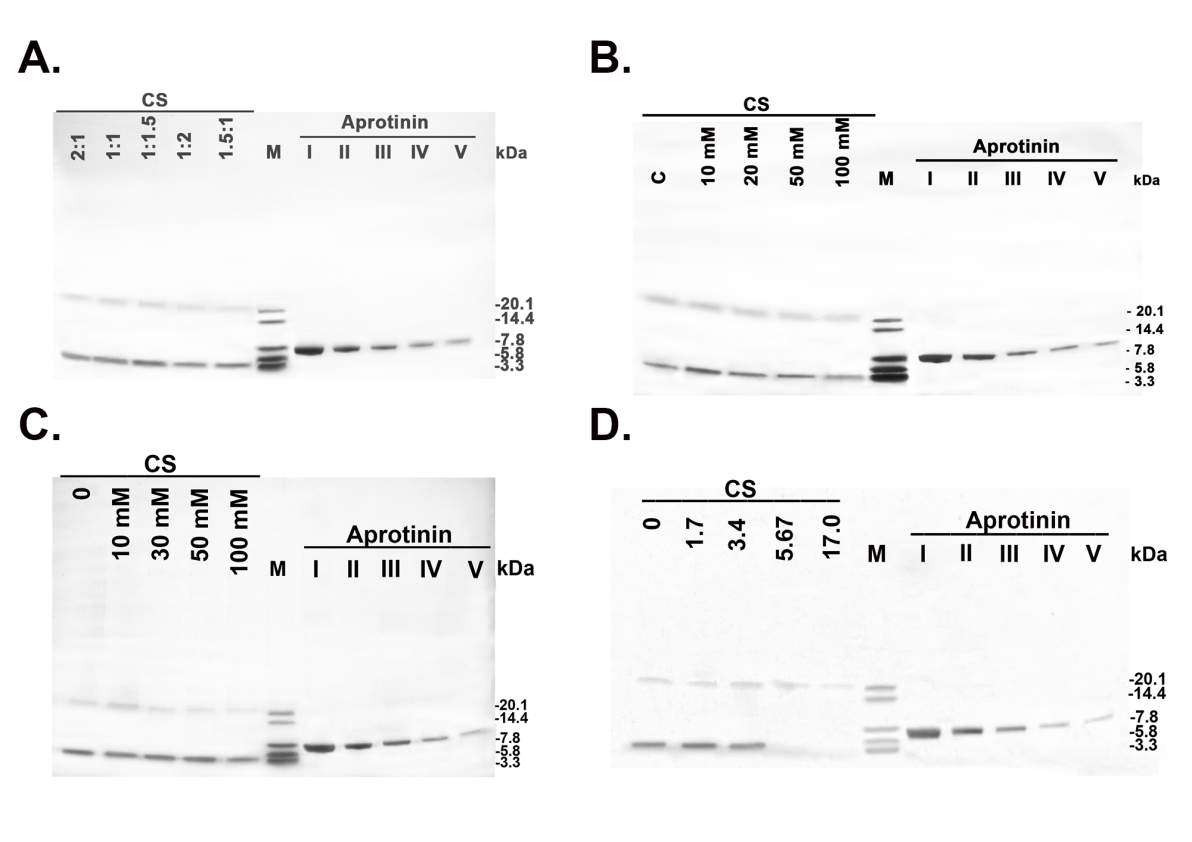


**Fig. S12.** SDS-PAGE results for rhBNP after stepwise medium optimization. (A) SDS-PAGE result for rhBNP under different tryptone–yeast extract ratio. (B) SDS-PAGE results for rhBNP under different phosphate buffer concentration. (C) SDS-PAGE result for rhBNP under different glucose concentration. (D) SDS-PAGE results for rhBNP under different ammonium sulfate concentration.


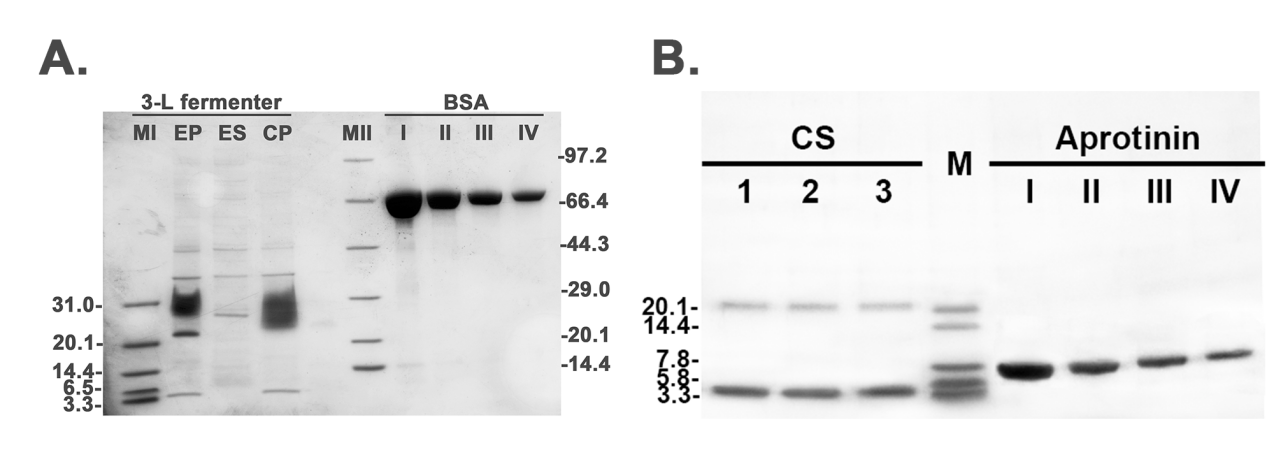


**Fig. S13.** SDS-PAGE results for cSAT-rhBNP and rhBNP after 3-L fermentation. (A) SDS-PAGE result for cSAT-rhBNP after 3-L fermentation. (B) SDS-PAGE result for rhBNP after 3-L fermentation. MI, MII: protein marker; EP: precipitate of the cell lysate after expression; CP: precipitate of intein-mediated cleavage; CS: supernatant of intein-mediated cleavage; ES: supernatant of the cell lysate after expression. The BSA standard concentrations I-IV were 2.0 mg/mL, 1.0 mg/mL, 0.5mg/mL, 0.25mg/mL. The Aprotinin standard concentrations I-IV were 0.5 mg/mL, 0.25 mg/mL, 0.125 mg/mL, 0.0625mg/mL.

1. **Supplemental Tables**

**Table S1. Amino acid sequence used in this study.**

| Protein name | Sequence | Source |
| --- | --- | --- |
| L6KD | LLLLLLKD | [1] |
| PT Linker | PTPPTTPTPPTTPTPTP | [2] |
| Mtu ΔI-CM intein | ALAEGTRIFDPVTGTTHRIEDVVDGRKPIHVVAAAKDGTLHARPVVSWFDQGTRDVIGLRIAGGAILWATPDHKVLTEYGWRAAGELRKGDRVAQPRRFDGFGDSAPIPARVQALADALDDKFLHDMLAEELRYSVIREVLPTRRARTFGLEVEELHTLVAEGVVVHN | [2] |
| rhBNP | SPKMVQGSGCFGRKMDRISSSSGLGCKVLRRH | [3] |

**Table S2. qPCR primers used in this study.**

| Primer name | Sequence (5’-3’) | Description |
| --- | --- | --- |
| *E.coli* *gyrA*-F | AATACCCAACCAAGTCGCGT | Reference (housekeeping) gene for ΔΔCq normalization |
| *E.coli gyrA*-R | TCGCAGTCATCTACCTGCAC |
| *E.coli gcvT*-F | AACCGGCAGATCGTGACTTT | qPCR of **aminomethyltransferase (GCS T-protein)** to monitor **glycine-cleavage flux** linked to C/N rewiring and alkalinization |
| *E.coli gcvT*-R | TTACGCAGCACGCCTTTTTC |
| *E.coli gcvP*-F | CCAGGTTAAAGCCGGTGTCT | qPCR of **glycine decarboxylase P-protein** to assess **GCS entry step** and its contribution to intracellular pH shift |
| *E.coli gcvP*-R | ACTGCAACTTCACGGCTGTA |
| *E.coli gcvH*-F | TAAACGACGCACTGAGCGAT | qPCR of **lipoamide carrier (GCS H-protein)** to track **cofactor-shuttling capacity** within the glycine-cleavage system |
| *E.coli gcvH*-R | CAATGCTTCGTATGCGGTCG |
| *E.coli aspA*-F | CGGTCTGGAACTGATGGGTC | qPCR of **aspartate ammonia-lyase** (Asp → fumarate + NH3) to gauge **TCA influx and ammonia release** under induction |
| *E.coli aspA*-R | AGCCTTCACGCAGTTGGTTA |
| *E.coli dadA*-F | TGAAACCGGAGACTGTCAGC | qPCR of **D-amino-acid dehydrogenase (FAD-dependent)** to monitor **amino-acid deamination/NH3 generation** impacting proton balance |
| *E.coli dadA*-R | ATCACATACGCATCGGCCTT |
| *E.coli astB*-F | TACCCGTCACCGTTTTCAGG | qPCR of **succinylornithine transaminase (Arginine succinyltransferase pathway)** to track **Arg-catabolism → succinate** coupling |
| *E.coli astB*-R | GACGCAGCACCGGAATAAAC |
| *E.coli gdhA*-F | AAATGCCCTGACTACCCTGC | qPCR of **NADP-dependent glutamate dehydrogenase** to assess **NH₄⁺ assimilation (α-KG→Glu) and NADPH demand** relevant to pH homeostasis |
| *E.coli gdhA*-R | GCTTTTTCATCATCCCCGCC |
| *E.coli glcD*-F | GGTGTGTTGTTGGTGATGGC | qPCR of glycolate oxidase flavoprotein subunit to track C2 flux into the glyoxylate shunt |
| *E.coli glcD*-R | CGTTCAGCGTTTGCACTTCA |
| *E.coli frdA*-F | GGGCGAGCCGAAAAACAAAT | qPCR of **fumarate reductase flavoprotein subunit** to track the **anaerobic fumarate-respiration branch** and succinate formation |
| *E.coli frdA*-R | CTTTCGCCAGTTCGCAGATG |
| *E.coli sucA*-F | GCAGTTTGCTCACGTCAAGG | qPCR of **OGDH E1 (decarboxylase)** to track NADH-producing flux at the α-KG→succinyl-CoA step |
| *E.coli sucA*-R | CATAACGCAGAGAAGCCCCA |
| *E.coli aceB*-F | TTGCTGATTGAAACGCTGCC | qPCR of **malate synthase A** (terminal step of the glyoxylate shunt) to gauge bypass flux |
| *E.coli aceB*-R | CATCGTCACTGCCTGTCTGT |
| *E.coli dnaK*-F | AGCTGGTACAGACTCGCAAC | qPCR of **Hsp70 chaperone DnaK** to assess protein-folding stress and aggregation pressure under induction |
| *E.coli dnaK*-R | GCAGTCAGTGCAGACTCGAT |
| *E.coli clpB*-F | ATTTCTGACGAGGCGCTGAA | qPCR of **AAA+ disaggregase *clpB*** to evaluate inclusion-body stress in cooperation with the *dnaK* system |
| *E.coli clpB*-R | CCCGGAACCAATTCACCAGA |
| *E.coli aceA*-F | TTCCAGTTCATCACCCTGGC | qPCR of **isocitrate lyase** (glyoxylate-shunt initiation) to track bypass activation |
| *E.coli aceA*-R | GGCTGCTGCACTTTCTCAAC |
| *E.coli garK*-F | GCGCAGGCGATAGAAAAAGG | qPCR of **glycerate kinase** (glycerate → 2-phosphoglycerate) to monitor routing of glyoxylate-derived carbon back to glycolysis |
| *E.coli garK*-R | GATCCCCCAACTGGCATTCA |

**Table S3. Results of tryptone:yeast extract ratio optimization (yield, terminal OD600, terminal broth pH).**

| Tryptone:yeast extract ratio | cSAT-rhBNP yield  (mg/L medium) | rhBNP yield  (mg/L medium) | Terminal OD600 | Terminal pH (broth) |
| --- | --- | --- | --- | --- |
| 2:1 (LB medium) | 563 ± 28 | 39.5 ± 1.7 | 6.0 ± 0.05 | 8.58 ± 0.03 |
| 1:1 | 780 ± 22 | 67.9 ± 4.2 | 8.8 ± 0.2 | 8.87 ± 0.02 |
| 1:1.5 | 964 ± 23 | 70.8 ± 2.8 | 11.2 ± 0.2 | 8.87 ± 0.03 |
| 1:2 | 854 ± 38 | 39.4 ± 2.4 | 12.3 ± 0.3 | 8.63 ± 0.06 |
| 1.5:1 | 850 ± 16 | 57.8 ± 2.4 | 10.5 ± 0.3 | 8.77 ± 0.04 |

**Table S4. Results of phosphate concentration optimization (yield, terminal OD600, terminal broth pH).**

| Phosphate  (total, mM) | cSAT-rhBNP yield  (mg/L medium) | rhBNP yield  (mg/L medium) | Terminal OD600 | Terminal pH (broth) |
| --- | --- | --- | --- | --- |
| 0 (LB medium) | 977 ± 14 | 70.4 ± 2.7 | 11.7 ± 0.3 | 8.89 ± 0.04 |
| 10 | 1327 ± 69 | 115.6 ± 5.2 | 12.4 ± 0.2 | 8.88 ± 0.03 |
| 20 | 1188 ± 80 | 98.9 ± 2.1 | 14.3 ± 0.3 | 8.78 ± 0.04 |
| 50 | 1090 ± 42 | 83.5 ± 5.1 | 13.5 ± 0.2 | 8.39 ± 0.05 |
| 100 | 707 ± 34 | 66.7 ± 5.8 | 13.6 ± 0.3 | 7.61 ± 0.06 |

**Table S5. Results of glucose concentration optimization (yield, terminal OD600, terminal broth pH).**

| Glucose (mM) | cSAT-rhBNP yield  (mg/L medium) | rhBNP yield  (mg/L medium) | Terminal OD600 | Terminal pH (broth) |
| --- | --- | --- | --- | --- |
| 0 | 1119 ± 30 | 84.5 ± 5.1 | 13.6 ± 0.2 | 8.44 ± 0.05 |
| 10 | 1140 ± 45 | 92.5 ± 2.9 | 15.6 ± 0.3 | 7.86 ± 0.06 |
| 30 | 1207 ± 45 | 99.1 ± 2.6 | 17.4 ± 0.3 | 7.49 ± 0.06 |
| 50 | 1240 ± 61 | 103.5 ± 3.0 | 16.2 ± 0.2 | 7.33 ± 0.05 |
| 100 | 789 ± 104 | 42.3 ± 8.0 | 15.7 ± 0.3 | 5.39 ± 0.05 |

**Table S6. Results of (NH4)2SO4 concentration optimization (yield, terminal OD600, terminal broth pH).**

| (NH4)2SO4 (g/L) | cSAT-rhBNP yield  (mg/L medium) | rhBNP yield  (mg/L medium) | Terminal OD600 | Terminal pH (broth) |
| --- | --- | --- | --- | --- |
| 0 | 1312 ± 28 | 106.5 ± 6.2 | 16.2 ± 0.2 | 7.33 ± 0.04 |
| 1.7 | 1408 ± 26 | 115.4 ± 4.7 | 17.0 ± 0.2 | 7.04 ± 0.02 |
| 3.4 | 1322 ± 53 | 77.2 ± 6.1 | 16.9 ± 0.2 | 6.65 ± 0.11 |
| 5.67 | 354 ± 30 | 0 | 17.3 ± 0.2 | 5.55 ± 0.06 |
| 17.0 | 299 ± 54 | 0 | 15.3 ± 0.3 | 5.33 ± 0.08 |

**References**

1. Zhou, Bihong, et al. "Small surfactant-like peptides can drive soluble proteins into active aggregates." Microbial cell factories 11.1 (2012): 10.
2. Lin, Zhanglin, et al. "A cleavable self-aggregating tag scheme for the expression and purification of disulfide bonded proteins and peptides." Chemical Engineering Science 262 (2022): 118052.
3. Pandey, Kailash N. "Molecular signaling mechanisms and function of natriuretic peptide receptor-A in the pathophysiology of cardiovascular homeostasis." Frontiers in physiology 12 (2021): 693099.
